# Supplementary material for: Effect of the Coronavirus Disease 2019 Pandemic on the Quality of Stroke Care in Stroke Units and Alternative Wards: A National Comparative Analysis
Source: PubMed Central journal article supplement — J Stroke. 2022 Jan 31;24(1):79–87. doi: 10.5853/jos.2021.02530 (PMC8829483; doi:10.5853/jos.2021.02530), 2022-01-31
Supplement: jos-2021-02530-suppl2.pdf [file jos-2021-02530-suppl2.pdf]

**Supplementary Table 1.** Differences in the trends of provision of nursing and allied health interventions between stroke units and other ward settings

|                                                                | Difference in the weekly trend prior to the interruption | Difference during the week of the interruption | Difference in the weekly trend in the post-interruption period |
|----------------------------------------------------------------|----------------------------------------------------------|------------------------------------------------|----------------------------------------------------------------|
| Provided antithrombotic medication within 48 hours of arrival* | 0.09 (0.04 to 0.14) <sup>†</sup>                         | -5.35 (-9.08 to -1.61) <sup>†</sup>            | 0.19 (-0.25 to 0.63)                                           |
| Mobilized during the admission                                 | -0.15 (-0.23 to -0.07) <sup>†</sup>                      | 2.88 (-0.34 to 6.11)                           | 0.06 (-0.62 to 0.75)                                           |
| Provided swallow screen or assessment                          | -0.01 (-0.04 to 0.02)                                    | -5.81 (-8.62 to -2.99) <sup>†</sup>            | 0.86 (0.48 to 1.24) <sup>†</sup>                               |
| Discharged to inpatient rehabilitation                         | 0.02 (-0.01 to 0.04)                                     | -2.44 (-3.75 to -1.12) <sup>†</sup>            | 0.52 (0.09 to 0.95) <sup>†</sup>                               |

Values are presented as  $\beta$  (95% confidence interval).  $\beta$  In a period signifies the difference in the average weekly percentage change over several weeks (trend) between groups.  $\beta$  During the week of the interruption signifies the difference in percentage change during that week between the groups. Positive values indicate a greater relative percentage increase in the provision of evidence-based care in stroke units compared with other ward settings. Negative values indicate a greater relative percentage decrease in the provision of evidence-based care in stroke units compared with other ward settings.

\*Excluding patients with intracerebral hemorrhage; <sup>†</sup>Values indicate significant differences.

**Supplementary Table 2.** Differences in the trends of provision of secondary prevention medications and care plans at discharge between stroke units and other ward settings

|                                                     | Difference in the weekly trend prior to the interruption | Difference during the week of the interruption | Difference in the weekly trend in the post-interruption period |
|-----------------------------------------------------|----------------------------------------------------------|------------------------------------------------|----------------------------------------------------------------|
| Prescribed antihypertensive medication at discharge | 0.09 (-0.05 to 0.22)                                     | -2.82 (-8.31 to 2.67)                          | 0.58 (0.08 to 1.07) <sup>†</sup>                               |
| Prescribed antithrombotic medication at discharge*  | 0.01 (-0.08 to 0.1)                                      | 0.41 (-4.84 to 5.65)                           | 1.08 (0.78 to 1.38) <sup>†</sup>                               |
| Prescribed lipid lowering medication at discharge*  | 0.05 (-0.02 to 0.13)                                     | -3.49 (-7.76 to 0.78)                          | 0.69 (0.28 to 1.09) <sup>†</sup>                               |
| Discharged to the community with a care plan        | -0.09 (-0.17 to -0.01) <sup>†</sup>                      | 3.61 (0.28 to 6.94) <sup>†</sup>               | 0.35 (-0.64 to 1.34)                                           |

Values are presented as  $\beta$  (95% confidence interval).  $\beta$  In a period signifies the difference in the average weekly percentage change over several weeks (trend) between groups.  $\beta$  During the week of the interruption signifies the difference in percentage change during that week between the groups. Positive values indicate a greater relative percentage increase in the provision of evidence-based care in stroke units compared with other ward settings. Negative values indicate a greater relative percentage decrease in the provision of evidence-based care in stroke units compared with other ward settings.

\*Excluding patients with intracerebral hemorrhage; <sup>†</sup>Values indicate significant differences.
