# Supplementary material for: Effect of the Coronavirus Disease 2019 Pandemic on the Quality of Stroke Care in Stroke Units and Alternative Wards: A National Comparative Analysis
Source: PubMed Central journal article supplement — J Stroke. 2022 Jan 31;24(1):79–87. doi: 10.5853/jos.2021.02530 (PMC8829483; doi:10.5853/jos.2021.02530), 2022-01-31
Supplement: jos-2021-02530-suppl4.pdf [file jos-2021-02530-suppl4.pdf]

## Supplementary acknowledgments

### AuSCR COVID-19 reporting consortium group

The following authors contributed to the interpretation of data, critical revision of the article, and collection of data.

Alaa Alghamry (The Prince Charles Hospital, Queensland, Australia)

Lauren Arthurson (Echuca Regional Health, Victoria, Australia)

Jonnel Boco (Caboolture, Queensland, Australia)

Melanie Brown (Goulburn Valley Health, Victoria, Australia)

Helen Brown (Princess Alexandra Hospital, Queensland, Australia)

Ernie Butler (Peninsula Health, Victoria, Australia)

Greg Cadigan (Queensland Health, Queensland, Australia)

Anna Clissold (South West Healthcare, Victoria, Australia)

Janell Cole (North West Regional Hospital, Tasmania, Australia)

Douglas Crompton (Northern Health, Victoria, Australia)

Vanessa Crosby (Albury Wodonga Health, Victoria & New South Wales, Australia)

Geoffrey Donnan (University of Melbourne, Parkville, Australia)

Angela Dos Santos (Alfred Health, Victoria, Australia)

Ramesh Durairaj (Cairns Hospital, Queensland, Australia)

Chris Ebersohn (Wimmera Base Hospital, Victoria, Australia)

Andrew Evans (Westmead Hospital, New South Wales, Australia)

Brett Forge (West Gippsland Hospital, Victoria, Australia)

Karen Fuller (Wollongong Hospital, New South Wales, Australia)

Nisal Gange (Toowoomba Hospital, Queensland, Australia)

Yash Gawarikar (Calvary Hospital, Australian Capital Territory, Australia)

Richard Geraghty (Redcliffe Hospital, Queensland, Australia)

Rohan Grimley (Sunshine Coast University Hospital, Birtinya, Queensland)

Susan Hillier (University of South Australia, Adelaide, South Australia, Australia)

Kate Jackson (Agency for Clinical Innovation, New South Wales, Australia)

Martin Jude (Wagga Wagga Hospital, New South Wales, Australia)

Salman Khan (Nepean Hospital, New South Wales, Australia)

Monique Kilkenny (Monash University, Victoria, Australia)

Thomas Kraemer (Ballarat Base Services, Victoria, Australia)

Alex Lau (Logan Hospital, Queensland, Australia)

Henry Ma (Monash Health, Victoria, Australia)

Krishna Mandaleson (Central Gippsland Health Service)

Romesh Markus (St Vincent's Hospital, Sydney, New South Wales, Australia)

Peter Mitchell (Royal Melbourne Hospital, Victoria, Australia)

Stephen Moore (Lismore Base Hospital, New South Wales, Australia)

Julie Morrison (The Florey Institute of Neuroscience and Mental Health, Victoria, Australia)

Neha Nandal (Mackay Base Hospital, Queensland, Australia)

Kim Parrey (Port Macquarie Hospital, New South Wales, Australia)

Lauren Pesavento (Melbourne Health, Victoria, Australia)

Juan Rois-Gnecco (Ipswich, Queensland, Australia)

Darshan Shah (Gold Coast University Hospital, Queensland, Australia)

Daniel Schweitzer (Mater Hospital Brisbane, Queensland, Australia)

Amanda Siller (Queen Elizabeth II Jubilee Hospital, Queensland, Australia)

Jenni Steel (Port Macquarie Hospital, New South Wales, Australia)

Karen Stephens (Eastern Health, Victoria, Australia)

Louise Starkie (Hamilton Base Hospital, Victoria, Australia)

Meng Tan (Gold Coast University Hospital and Robina Hospital, Queensland, Australia)

Vincent Thijs (Austin Health, Victoria, Australia)

Dinesh Tryambake (Launceston General Hospital, Tasmania, Australia)

Rebecca Weir (Northeast Health Wangaratta, Victoria, Australia)

Leanne Whiley (Rockhampton Hospital, Queensland, Australia)

Richard White (Townsville Hospital, Queensland, Australia)

Tissa Wijeratne (Western Health, Victoria, Australia)

Matt Willcourt (Flinders Medical Centre, South Australia, Australia)

Nigel Wolfe (Blacktown Hospital, New South Wales, Australia)

Andrew Wong (Royal Brisbane and Women's Hospital, University of Queensland, Queensland, Australia)

Peter Wood (Bundaberg Hospital & Hervey Bay Hospital, Queensland, Australia)

Jorge Zavala (Alfred Health, Victoria, Australia).

### The AuSCR consortium group

Evelyn Anino (Queen Elizabeth II Jubilee Hospital, Queensland, Australia)

Joanne Ashford (Mackay Hospital, Queensland, Australia)

Jennifer Bergqvist (Western Health, Victoria, Australia)

Haylee Berrill (Gold Coast University & Robina Hospitals, Queensland, Australia)

Pauline Blaney (Hervey Bay Hospital, Queensland, Australia)

Deirdre Broadby (Royal Hobart Hospital, Tasmania, Australia)

Michelle Bronca (Flinders Medical Centre, South Australia, Australia)

Camelia Burdusel (Blacktown Hospital, New South Wales, Australia)

- Carla Borg Caruana (Alfred Health, Victoria, Australia)  
Aylissa Canning (Princess Alexandra Hospital, Queensland, Australia)  
Kristine Caprecho (Calvary Hospital, Australian Capital Territory, Australia)  
John Carmody (Wollongong Hospital, New South Wales, Australia)  
Shaji Chacko (Gympie Hospital, Queensland, Australia)  
Kerri Chamberlain (Wimmera Base Hospital, Victoria, Australia)  
Michelle Coad (Port Macquarie Hospital, New South Wales, Australia)  
Kathryn Colebourne (The Prince Charles Hospital, Queensland, Australia)  
Tessa Coupland (Bendigo Health, Victoria, Australia)  
Shahla Cowans (Canberra Health Services, Australian Capital Territory, Australia)  
Dijana Cukanovic-Krebs (Cairns Hospital, Queensland, Australia)  
Sonia Dann (Bundaberg Hospital, Queensland, Australia)  
Lizzie Dodd (Royal Adelaide Hospital, South Australia, Australia)  
Helen Eaves (Bundaberg Hospital, Queensland, Australia)  
Linda Edwards (Ipswich Hospital, Queensland, Australia)  
Troy Elliott (Cairns Hospital, Queensland, Australia)  
Tanya Frost (Eastern Health, Victoria, Australia)  
Karen Fuller (Wollongong Hospital, New South Wales, Australia)  
Renaë Gamble (Austin Health, Victoria, Australia)  
Belinda Green (Alfred Health, Victoria, Australia)  
Patrick Groot (South West Healthcare, Victoria, Australia)  
Kushantha Gunarathne (Bairnsdale Regional health Service, Victoria, Australia)  
Casey Hair (Ballarat Base Services, Victoria, Australia)  
Nicola Hall (Logan Hospital, Queensland, Australia)  
Emma Harding (Swan Hill District Health, Victoria, Australia)  
Carolyn Harrison (Launceston General Hospital, Tasmania, Australia)  
Kim Hoffman (Lismore Base Hospital, New South Wales, Australia)  
Marnie Hollywood (Caboolture Hospital, Queensland, Australia)  
Deborah Holmes (St Vincent's Hospital, Sydney, New South Wales, Australia)  
Anne Hooper (Mackay Hospital, Queensland, Australia)  
Tracey Howlett (Logan Hospital, Queensland, Australia)  
Karen Hudson (Gympie Hospital, Queensland, Australia)  
Michelle Hutchinson (Flinders Medical Centre, South Australia, Australia)  
Manju John (Canberra Health Services, Australian Capital Territory, Australia)  
Cath Jones (Bass Coast Health, Victoria, Australia)  
Tracey Johnson (Gold Coast University Hospital, Queensland, Australia)  
Caitlin Kearney (The Prince Charles Hospital, Queensland, Australia)  
Lorraine Keene (West Gippsland Hospital, Victoria, Australia)  
Kanaga Lagma (Peninsula Health, Victoria, Australia)  
Kylie Lodge (Queen Elizabeth II Jubilee Hospital, Queensland, Australia)  
Jodi Lynch (Monash Health, Victoria, Australia)  
Laura Macdonald (Bairnsdale Regional health Service, Victoria, Australia)  
Elizabeth Mackey (Western Health, Victoria, Australia)  
Lyn Malone (Northeast Health Wangaratta, Victoria, Australia)  
Janet May (Latrobe Regional Hospital, Victoria, Australia)  
Marie McCaig (Mater Hospital, Queensland, Australia)  
Amanda McKee (Princess Alexandra Hospital, Queensland, Australia)  
Ian Meade (Townsville Hospital, Queensland, Australia)  
Jessica Miller (Monash Health, Victoria, Australia)  
Katherine Mohr (Wagga Wagga Hospital, New South Wales, Australia)  
Maxine Munting (North West Regional Hospital, Tasmania, Australia)  
Ashley Murray (West Gippsland Hospital, Victoria, Australia)  
Linda Norrie (Townsville Hospital, Queensland, Australia)  
Trish Oxley (Swan Hill District Health, Victoria, Australia)  
Kirsty Page (St Vincent's Hospital, Sydney, New South Wales, Australia)  
Arun Raju (Toowoomba Hospital, Queensland, Australia)  
Emara Ramchander (Western Health, Victoria, Australia)  
Erin Ray (Bendigo Health, Victoria, Australia)  
Deidre Rennick (Wimmera Base Hospital, Victoria, Australia)  
Timothy Richardson (Toowoomba Hospital, Queensland, Australia)  
Nina Roberts (Wimmera Base Hospital, Victoria, Australia)  
Ros Roberts (Mildura Base Public Hospital, Victoria, Australia)  
Anne Rodda (Northern Health, Victoria, Australia)  
Simone Rogers (Bundaberg Hospital, Queensland, Australia)  
David Rosaia (Bendigo Health, Victoria, Australia)  
Donna Rowley (Sunshine Coast University Hospital, Queensland, Australia)  
Ramesh Sahathevan (Ballarat Base Services, Victoria, Australia)  
Sebastian Saj (Nepean Hospital, New South Wales, Australia)  
Lauren Sanders (St Vincent's Hospital, Victoria, Australia)  
Mark Savage (Bendigo Health, Victoria, Australia)  
Patrick Scarff (St Vincent's Hospital, Victoria, Australia)  
Betsy Shaju (Ipswich Hospital, Queensland, Australia)  
Heather Smith (University Hospital Geelong, Victoria, Australia)  
Jennifer Steel (Port Macquarie Hospital, New South Wales, Australia)  
Margaret Stevenson (Peninsula Health, Victoria, Australia)

Leanne Taylor (Wimmera Base Hospital, Victoria, Australia)  
 Smisha Thomas (Royal Melbourne Hospital, Victoria, Australia)  
 Anne Van Berkel (Central Gippsland Health Service, Victoria, Australia)  
 Tamara Wanklyn (Western Health, Victoria, Australia)  
 Jaqueline Watson (Westmead Hospital, New South Wales, Australia)  
 Michelle Webb (Royal Brisbane and Women's Hospital, Queensland, Australia)  
 Tracey Whitehead (Townsville Hospital, Queensland, Australia)  
 Tanya Williams (Redcliffe Hospital, Queensland, Australia)  
 Jerry Wong (Queen Elizabeth II Jubilee Hospital, Queensland, Australia)  
 Toni Wonson (Wollongong Hospital, New South Wales, Australia)  
 Melissa Wood (Royal Brisbane and Women's Hospital, Queensland, Australia)  
 Martin Zolfel (Nepean Hospital, New South Wales, Australia)

#### **AuSCR office staff (not listed elsewhere)**

Helen Carter (The Florey Institute of Neuroscience and Mental Health, Victoria, Australia)  
 Adele Gibbs (The Florey Institute of Neuroscience and Mental Health, Victoria, Australia)  
 Shaun Hancock (The Florey Institute of Neuroscience and Mental Health, Victoria, Australia)  
 Marcus Lester (The Florey Institute of Neuroscience and Mental Health, Victoria, Australia)  
 Violet Marion (The Florey Institute of Neuroscience and Mental Health, Victoria, Australia)  
 Karen Moss (The Florey Institute of Neuroscience and Mental Health, Victoria, Australia)  
 Kate Paice (The Florey Institute of Neuroscience and Mental Health, Victoria, Australia)  
 Nancy Pompeani (The Florey Institute of Neuroscience and Mental Health, Victoria, Australia)  
 Olivia Ryan (The Florey Institute of Neuroscience and Mental Health, Victoria, Australia)  
 Sam Shehata (The Florey Institute of Neuroscience and Mental Health, Victoria, Australia)  
 Claire Weickhardt (The Florey Institute of Neuroscience and Mental Health, Victoria, Australia)

#### **AuSCR committee members (not listed elsewhere)**

Julie Bernhardt (The Florey Institute of Neuroscience and Men-

tal Health, Victoria, Australia)  
 Chris Bladin (The Florey Institute of Neuroscience and Mental Health, Victoria, Australia)  
 Ken Butcher (Prince of Wales Hospital, New South Wales, Australia)  
 Andrew Cheung (Prince of Wales and Liverpool Hospitals, New South Wales, Australia)  
 Philip Choi (Eastern Health, Victoria, Australia)  
 Alan Coulthard (Royal Brisbane and Womens Hospital, Queensland, Australia)  
 Coralie English (Hunter Medical Research Institute, New South Wales, Australia)  
 Sue Evans (Monash University, Victoria, Australia)  
 Darshan Ghia (Fiona Stanley Hospital, Western Australia, Australia)  
 Erin Godecke (Edith Cowan University, Western Australia, Australia)  
 Martin Krause (Royal North Shore Hospital, New South Wales, Australia)  
 Peter Hand (Alfred Health, Victoria, Australia)  
 Suzanne Kuys (Australian Catholic University, Queensland, Australia)  
 Mark Mackay (Royal Children's Hospital, Victoria, Australia)  
 John McNeil (Monash University, Victoria, Australia)  
 Ferdi Miteff (Royal North Shore Hospital, New South Wales, Australia)  
 Jennifer Muller (Consumer representative, Queensland, Australia)  
 Lisa Murphy (Stroke Foundation, Melbourne, Victoria, Australia)  
 Michael Pollack (Hunter Stroke Service, New South Wales, Australia)  
 Rebecca Scroop (Royal Adelaide Hospital, South Australia, Australia)  
 Mark Simcocks (Consumer representative, Victoria, Australia)  
 Frances Simmonds (University of Wollongong, New South Wales, Australia)  
 Brendan Steinfort (Royal North Shore Hospital, New South Wales, Australia)  
 Belinda Stojanovski (Royal Children's Hospital, Parkville)  
 Amanda Thrift (Monash University, Victoria, Australia)  
 Jason Wenderoth (Prince of Wales Hospital, New South Wales, Australia)  
 Andrew Wesseldine (St John of God Hospital, Western Australia, Australia)
